# Supplementary material
Source: PubMed Central journal article supplement (PMC8274958)
Supplement: NIHMS1706944-supplement-Supple_figs.pdf [file NIHMS1706944-supplement-Supple_figs.pdf]

**Suppl. Figure 1**

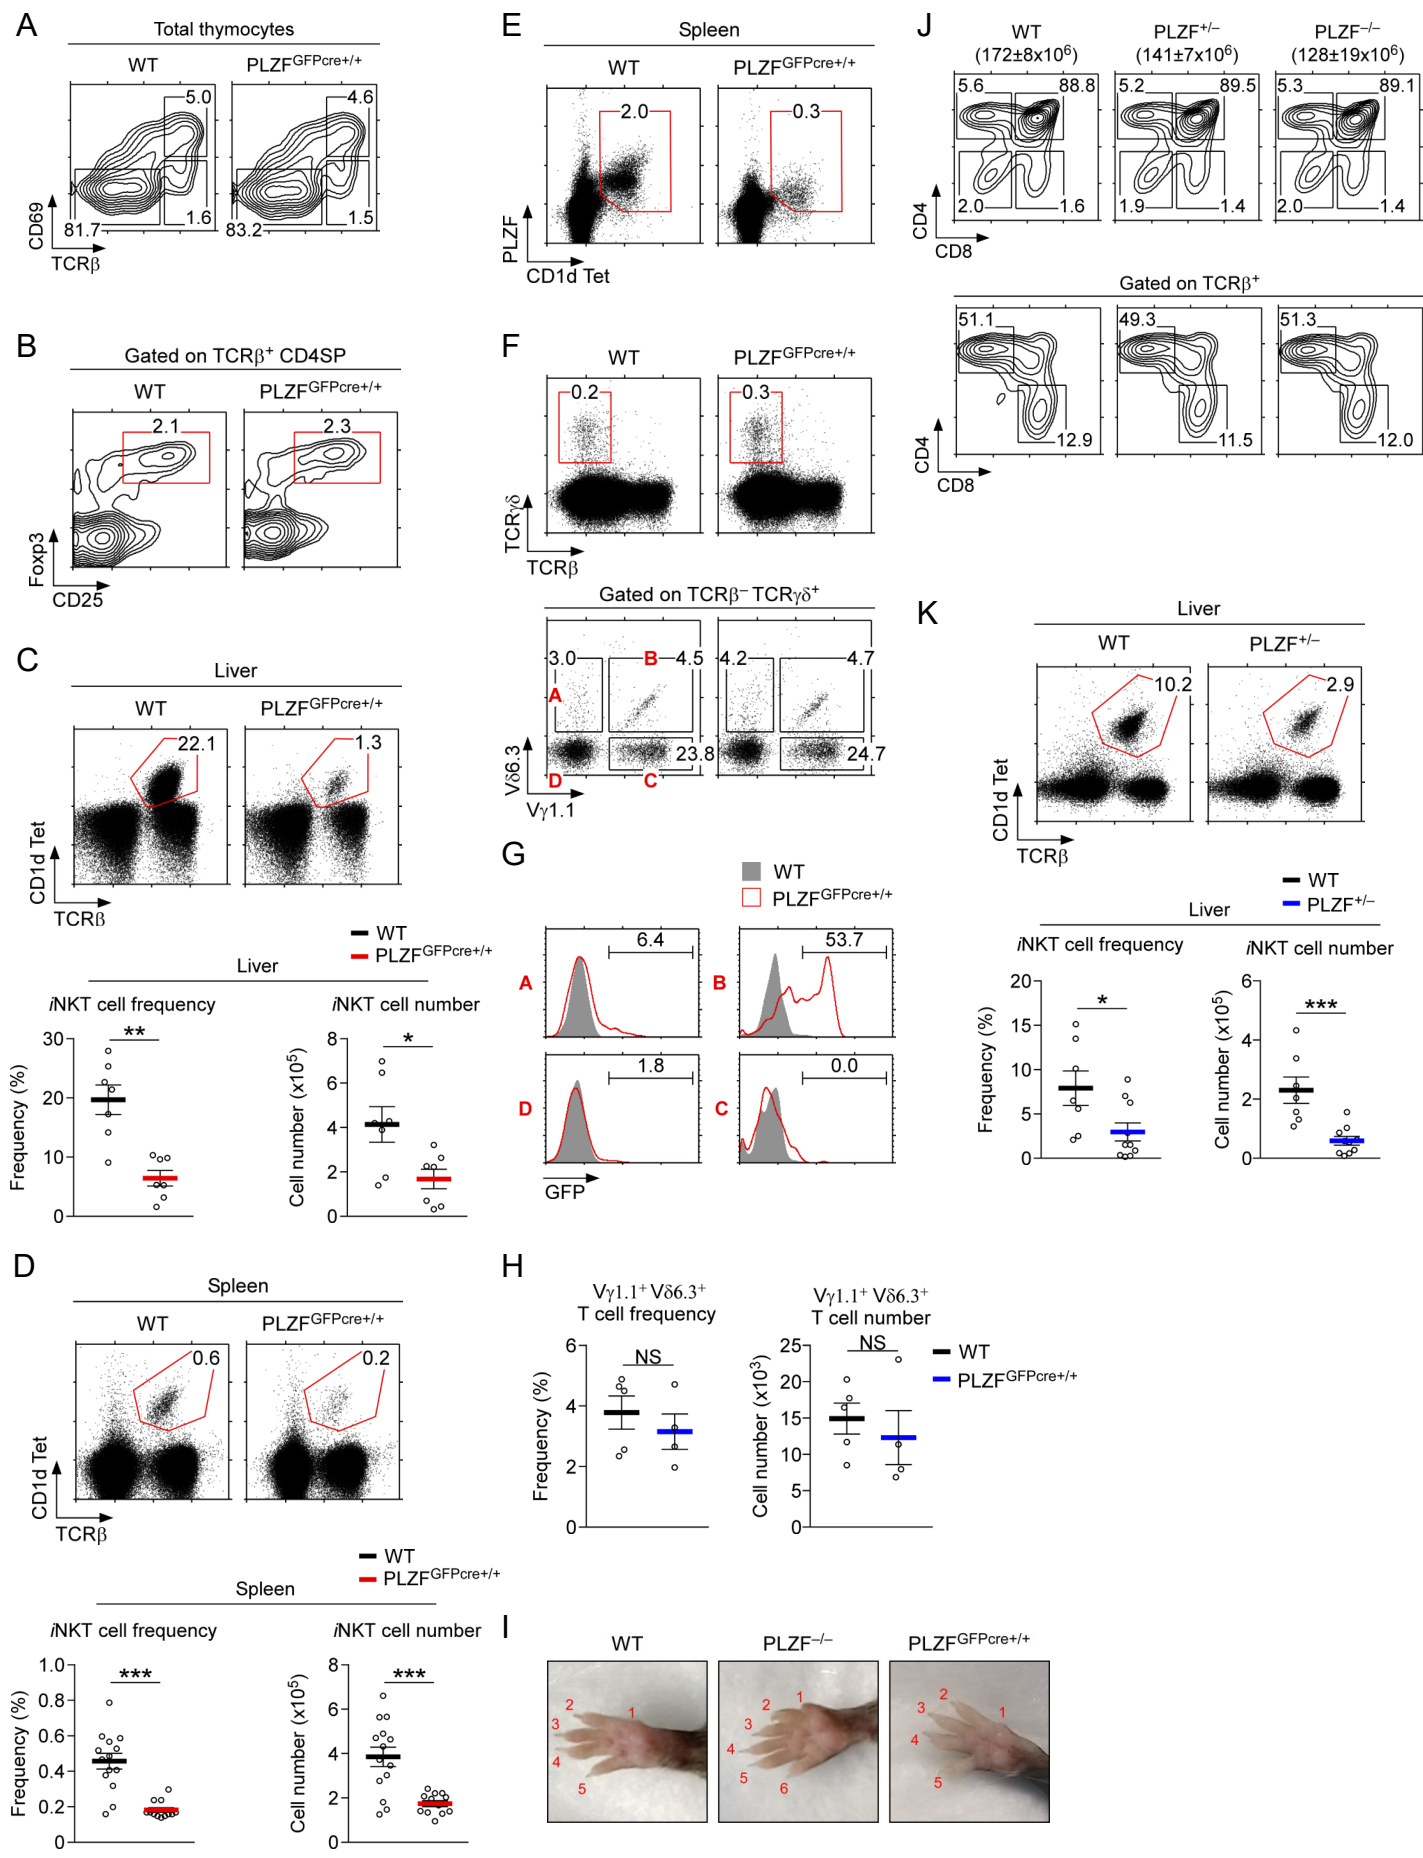

**Suppl. Figure 1. *i*NKT cell development in PLZF<sup>GFPcre</sup> knock-in mice.**

**Related to Figure 1 and Figure 2.**

- (A) CD69 versus TCR $\beta$  expression of WT and PLZF<sup>GFPcre/+</sup> total thymocytes.
- (B) Foxp3<sup>+</sup>CD25<sup>+</sup> Treg cells among CD4SP thymocytes of WT and PLZF<sup>GFPcre/+</sup> mice.
- (C, D) Liver and spleen *i*NKT cells were identified by CD1dTet and anti-TCR $\beta$  antibody staining. Graphs show frequencies (bottom, left) and numbers (bottom, right) of *i*NKT cells in C57BL/6 wildtype (WT) and PLZF<sup>GFPcre/+</sup> mice. Results show summary of 7 independent experiments.
- (E) PLZF expression in spleen *i*NKT cells of WT and PLZF<sup>GFPcre/+</sup> mice. Dot plots are representative of 3 independent experiments.
- (F) Frequencies of  $\gamma\delta$  T cells (top) and V $\gamma$ 1.1V $\delta$ 6.3  $\gamma\delta$  T cells (bottom) among thymocytes of the indicated mice. Results show summary of 3 independent experiments with total 5 WT and 4 PLZF<sup>GFPcre/+</sup> mice.
- (G) PLZF<sup>GFPcre</sup> reporter expression in thymic  $\gamma\delta$  T cell subsets, identified by distinct usages of V $\gamma$ 1.1 and V $\delta$ 6.3.
- (H) Frequencies and cell numbers of thymic V $\gamma$ 1.1V $\delta$ 6.3  $\gamma\delta$  T cells of indicated mice. Results show summary of 3 independent experiments with total 5 WT and 4 PLZF<sup>GFPcre/+</sup> mice.
- (I) Images of front limbs of the indicated mouse strains. Numbers indicate finger digits for each mouse.
- (J) CD4 versus CD8 profiles of total (top) and TCR $\beta$ <sup>+</sup>-gated thymocytes (bottom) of the indicated mice. Results show summary of 8 independent experiments with total 12 WT, 11 PLZF<sup>+/-</sup>, and 5 PLZF<sup>-/-</sup> mice.
- (K) Liver *i*NKT cells in PLZF<sup>+/-</sup> mice. *i*NKT cells were identified by CD1dTet and anti-TCR $\beta$  antibody staining (top), and frequency and number of liver *i*NKT cells were determined for the indicated mouse strains (bottom). Results are summary of 8 independent experiments.

# Suppl. Figure 2

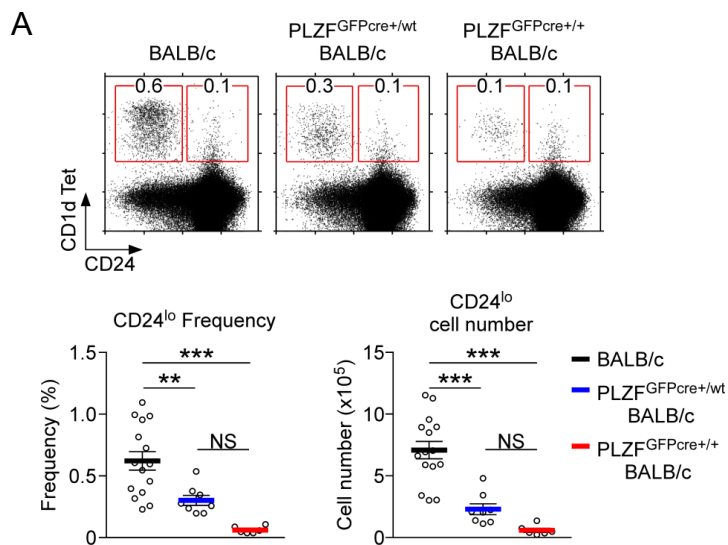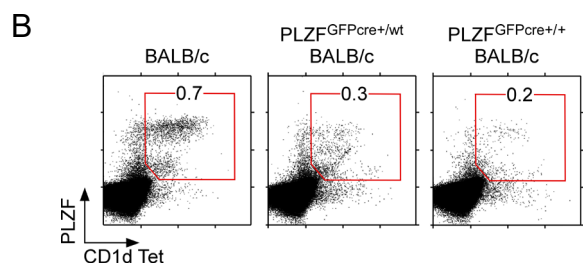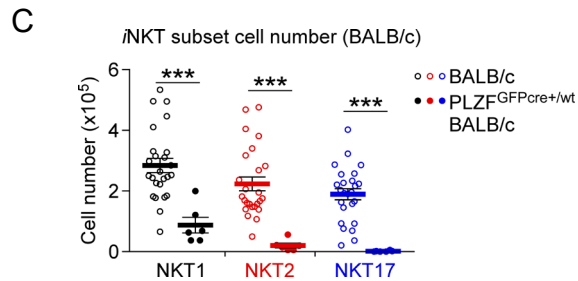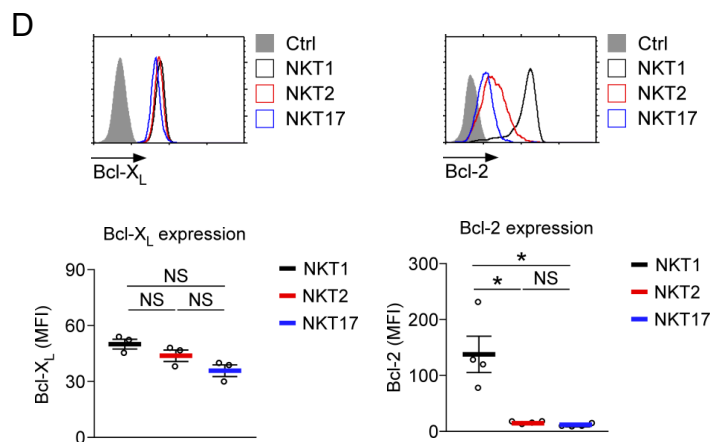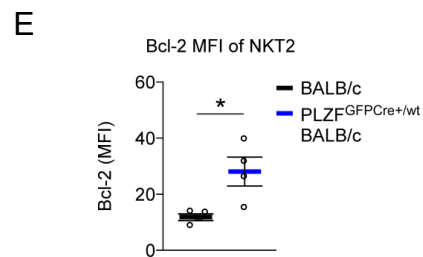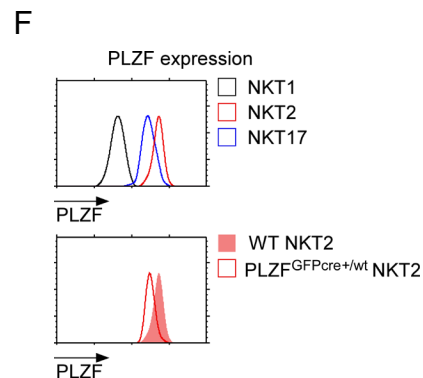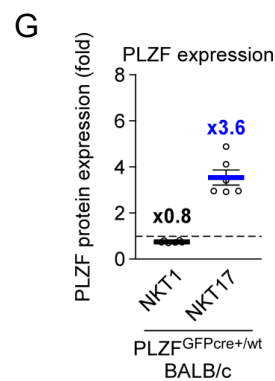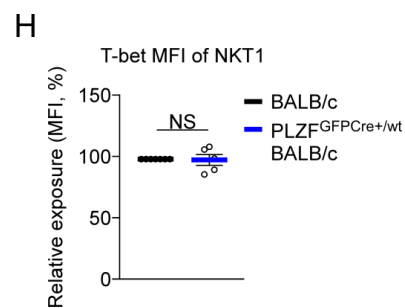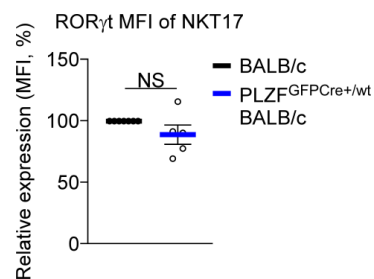

**Suppl. Figure 2. *i*NKT cell development in PLZF<sup>GFPcre</sup> BALB/c mice.**

**Related to Figure 3.**

(A) Mature (CD24<sup>lo</sup>) thymic *i*NKT cells were identified in BALB/c, PLZF<sup>GFPcre+/wt</sup> BALB/c and PLZF<sup>GFPcre+/+</sup> BALB/c mice (top). Frequencies (bottom left) and numbers (bottom right) of CD24<sup>lo</sup> thymic *i*NKT cells were determined from at least 6 independent experiments with 15 BALB/c, 8 PLZF<sup>GFPcre+/wt</sup> BALB/c and 6 PLZF<sup>GFPcre+/+</sup> BALB/c mice.

(B) Intracellular PLZF expression in thymic *i*NKT cells of indicated mice. Dot plots are representative of 3 independent experiments.

(C) Cell numbers of individual *i*NKT subsets in BALB/c and PLZF<sup>GFPcre+/wt</sup> BALB/c thymocytes. Results show summary of 6 independent experiments with 25 BALB/c and 6 PLZF<sup>GFPcre+/wt</sup> BALB/c mice.

(D) Intracellular staining for Bcl-x<sub>L</sub> and Bcl-2 in individual *i*NKT subsets of BALB/c thymocytes (top). Graphs show summary of 3 independent experiments with total 4 BALB/c and 4 PLZF<sup>GFPcre+/wt</sup> BALB/c mice

(E) Relative abundance of Bcl-2 proteins in thymic NKT2 cells of BALB/c and PLZF<sup>GFPcre+/wt</sup> BALB/c mice. Graph is summary of 3 independent experiments with total 4 BALB/c and 4 PLZF<sup>GFPcre+/wt</sup> BALB/c mice.

(F) Intracellular staining for PLZF in *i*NKT subsets of BALB/c thymocytes (top) and in thymic NKT2 cells from WT BALB/c and PLZF<sup>GFPcre+/wt</sup> BALB/c mice (bottom). Histograms are representative of 6 independent experiments.

(G) Relative PLZF expression in NKT1 and NKT17 subsets of PLZF<sup>GFPcre+/wt</sup> BALB/c thymocytes, which was determined as fold difference to PLZF expression in NKT1 cells of WT BALB/c. Results show summary of 6 independent experiments with 25 BALB/c and 6 PLZF<sup>GFPcre+/wt</sup> BALB/c mice.

(H) Relative abundance of T-bet (top) and RORγt proteins (bottom) in NKT1 and NKT17 cells of BALB/c and PLZF<sup>GFPcre+/wt</sup> BALB/c thymocytes, respectively. Data are summary of 5 independent experiments with total 7 BALB/c and 5 PLZF<sup>GFPcre+/wt</sup> BALB/c mice.

Suppl. Figure 3

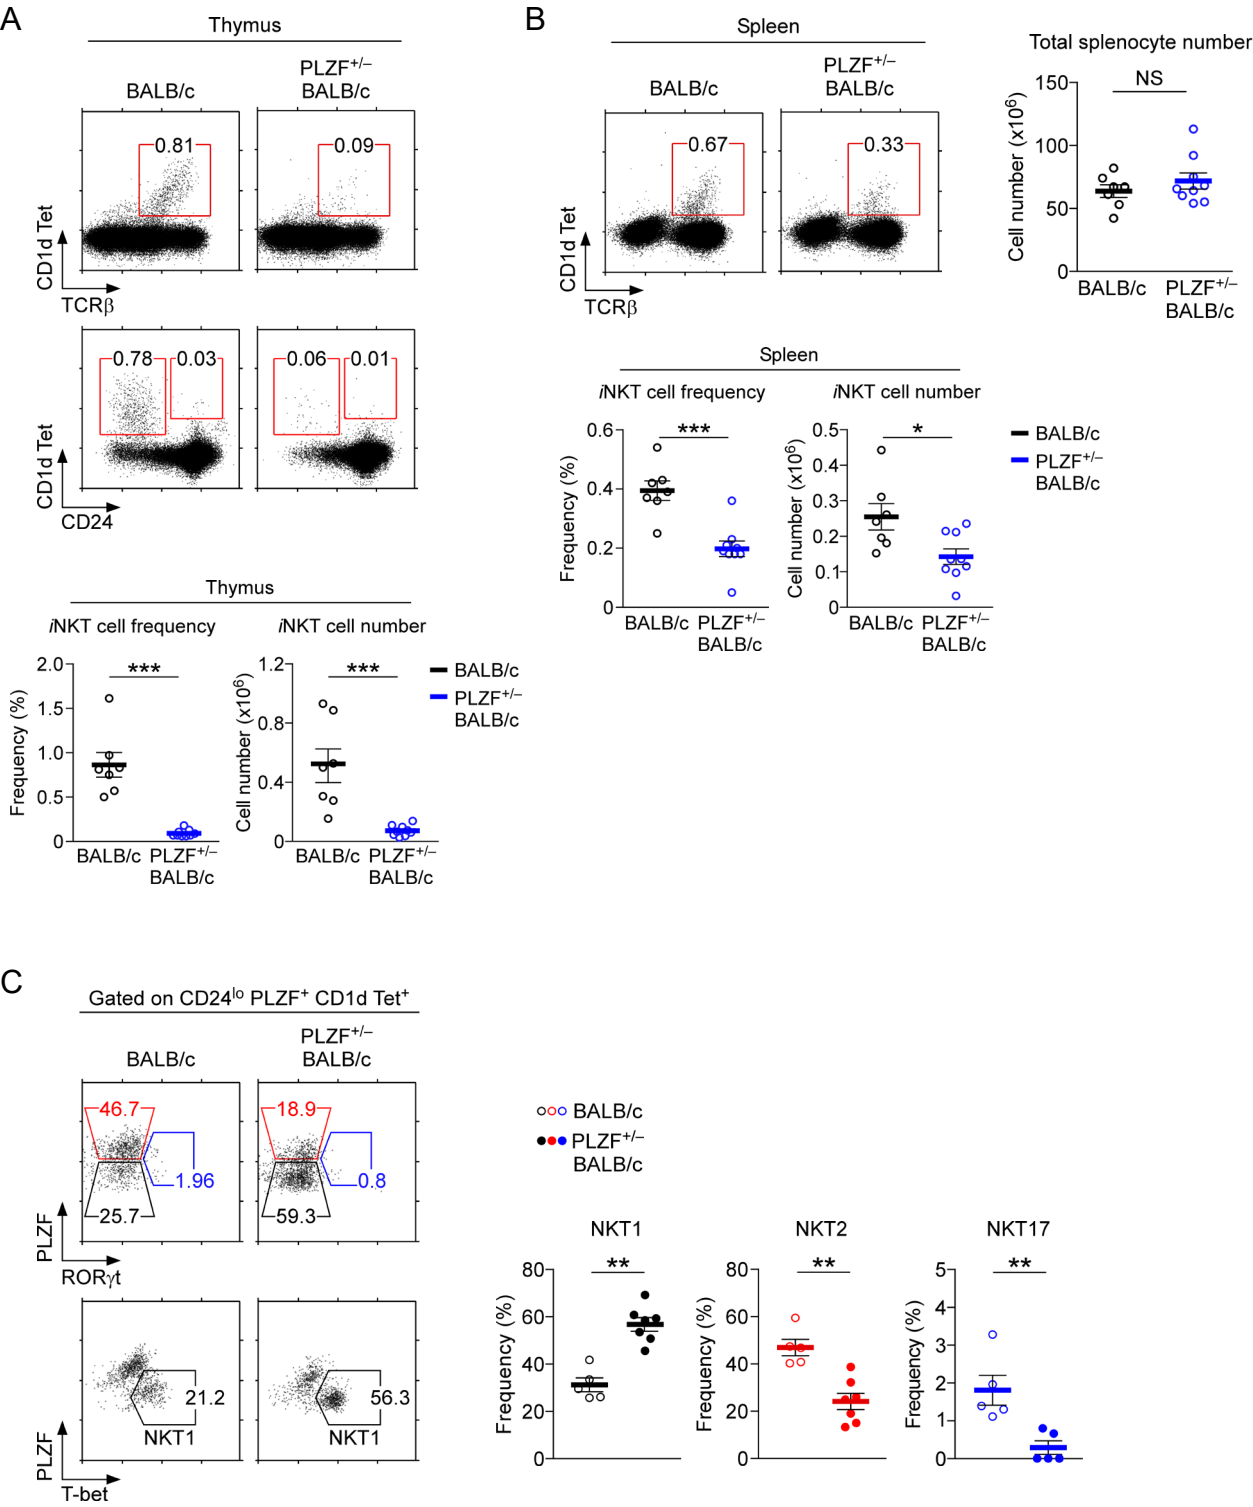

**Suppl. Figure 3. *i*NKT cells in PLZF<sup>+/-</sup> BALB/c thymocytes and spleen cells.  
Related to Figure 3.**

**(A)** Development of total (top) and mature (CD24<sup>lo</sup>) thymic *i*NKT cells (middle) was assessed from thymocytes of PLZF<sup>+/-</sup> BALB/c and littermate WT BALB/c mice (top). Frequencies (bottom left) and numbers (bottom right) of thymic *i*NKT cells were determined from 4 independent experiments with total 7 BALB/c and 9 PLZF<sup>+/-</sup> BALB/c mice.

**(B)** Frequency and number of spleen *i*NKT cells were determined from total splenocytes of PLZF<sup>+/-</sup> BALB/c and littermate WT BALB/c mice. Results show summary of 4 independent experiments with total 7 BALB/c and 9 PLZF<sup>+/-</sup> BALB/c mice.

**(C)** *i*NKT subset composition of splenic *i*NKT cells of PLZF<sup>+/-</sup> BALB/c and littermate WT BALB/c mice. Dot plots are representative (left) and graphs (right) show summary of 3 independent experiments with total 5 BALB/c and 7 PLZF<sup>+/-</sup> BALB/c mice.

**Suppl. Figure 4**

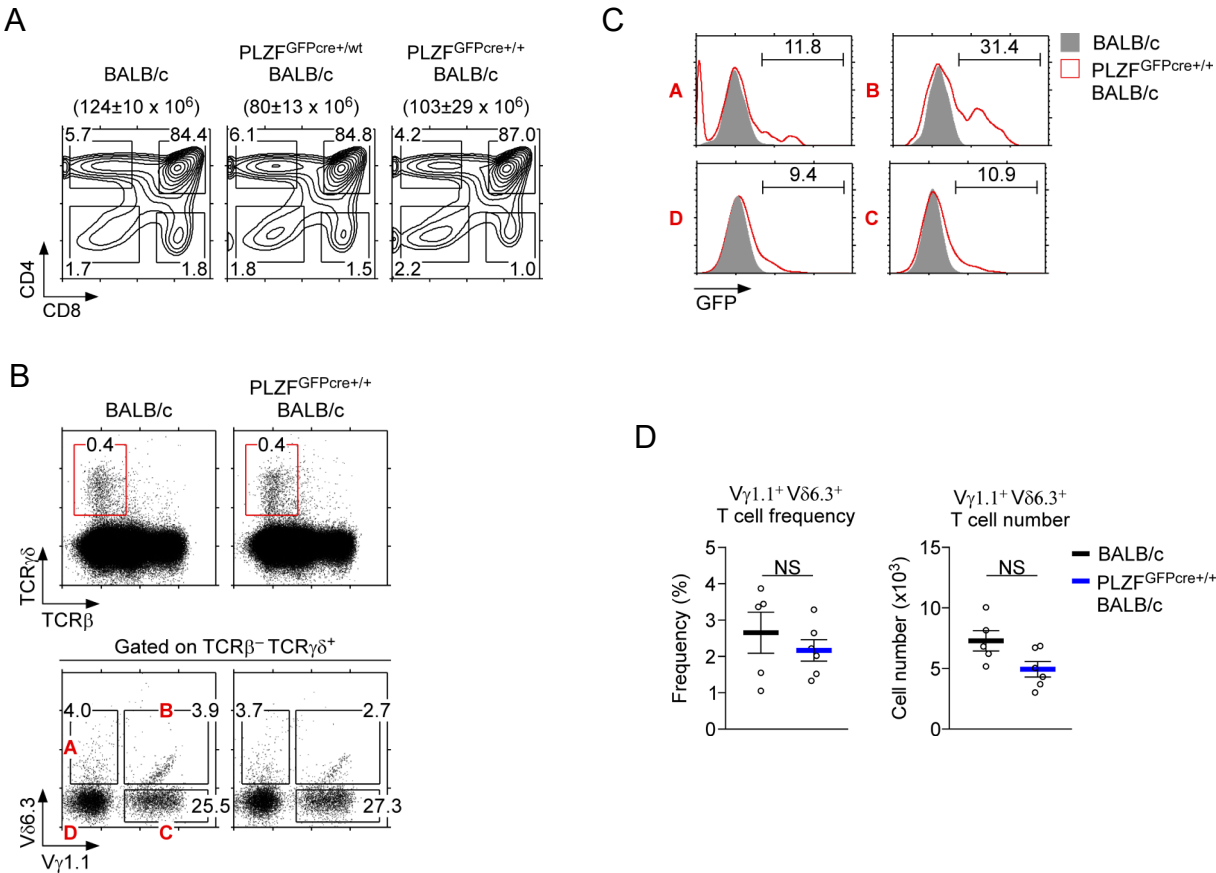

**Suppl. Figure 4. Thymocyte development in PLZF<sup>GFPcre</sup> BALB/c mice. Related to Figure 4.**

(A) CD4 versus CD8 profiles and total thymocyte numbers of the indicated mice. Results show summary of 3 independent experiments with total 13 BALB/c, 9 PLZF<sup>GFPcre</sup>/wt BALB/c, and 3 PLZF<sup>GFPcre</sup>/+ BALB/c mice.

(B) Frequencies of γδ T cells (top) and Vγ1.1Vδ6.3 γδ T cells (bottom) among thymocytes of the indicated mice. Results show summary of 3 independent experiments with total 5 BALB/c and 6 PLZF<sup>GFPcre</sup>/wt BALB/c mice.

(C) PLZF<sup>GFPcre</sup> reporter expression in thymic γδ T cell subsets, as identified by distinct usages of Vγ1.1 and Vδ6.3.

(D) Frequencies and cell numbers of thymic Vγ1.1Vδ6.3 γδ T cells of indicated mice. Results show summary of 3 independent experiments with total 5 BALB/c and 6 PLZF<sup>GFPcre</sup>/+ BALB/c mice.
